# Supplementary material for: Expansion of a BDCA1+CD14+ Myeloid Cell Population in Melanoma Patients May Attenuate the Efficacy of Dendritic Cell Vaccines
Source: Oxford University Press journal article supplement (doi:10.1158/0008-5472.can-15-1695), 2016-06-21
Supplement: 00085472can151695-sup-151654_3_supp_0_p87mww.doc [file 00085472can151695-sup-151654_3_supp_0_p87mww.doc]

**Supplementary Table S**1

| **Antibody Name** | **Target-UniProt Entry** |
| --- | --- |
| ANCA | PRTN3_HUMAN |
| BDNF | BDNF_HUMAN |
| CD10 | NEP_HUMAN |
| CD10 | NEP_HUMAN |
| CD10 | NEP_HUMAN |
| CD10 | NEP_HUMAN |
| CD105 | EGLN_HUMAN |
| CD106 | VCAM1_HUMAN |
| CD11a | CD11A_HUMAN |
| CD11a | CD11A_HUMAN |
| CD11a | CD11A_HUMAN |
| CD11b | CD11B_HUMAN |
| CD11b | CD11B_HUMAN |
| CD11b | CD11B_HUMAN |
| CD11c | ITAX_HUMAN |
| CD13 | AMPN_HUMAN |
| CD13 | AMPN_HUMAN |
| CD14 | CD14_HUMAN |
| CD14 | CD14_HUMAN |
| CD14 | CD14_HUMAN |
| CD147 | BASI_HUMAN |
| CD147 | BASI_HUMAN |
| CD15 |  |
| CD15 |  |
| CD15 |  |
| CD16 | FCG3A_HUMAN |
| CD16 | FCG3A_HUMAN |
| CD16 | FCG3A_HUMAN |
| CD162 | SELPL_HUMAN |
| CD17 |  |
| CD177 | CD177_HUMAN |
| CD18 | ITB2_HUMAN |
| CD18 | ITB2_HUMAN |
| CD18 | ITB2_HUMAN |
| CD19 | CD19_HUMAN |
| CD19 | CD19_HUMAN |
| CD1a | CD1A_HUMAN |
| CD2 | CD2_HUMAN |
| CD2 | CD2_HUMAN |
| CD2 | CD2_HUMAN |
| CD20 | CD20_HUMAN |
| CD20 | CD20_HUMAN |
| CD20 | CD20_HUMAN |
| CD21 | CR2_HUMAN |
| CD22 | CD22_HUMAN |
| CD22 | CD22_HUMAN |
| CD22 | CD22_HUMAN |
| CD222 | MPRI_HUMAN |
| CD23 | FCER2_HUMAN |
| CD235a | GLPA_HUMAN |
| CD235ab | GLPB_HUMAN |
| CD24 | CD24_HUMAN |
| CD25 | IL2RA_HUMAN |
| CD25 | IL2RA_HUMAN |
| CD25 | IL2RA_HUMAN |
| CD25 | IL2RA_HUMAN |
| CD27 | CD27_HUMAN |
| CD28 | CD28_HUMAN |
| CD29 | ITB1_HUMAN |
| CD29 | ITB1_HUMAN |
| CD3 | CD3E_HUMAN |
| CD3 | CD3E_HUMAN |
| CD3 | CD3E_HUMAN |
| CD30 | TNR8_HUMAN |
| CD31 | PECA1_HUMAN |
| CD33 | CD33_HUMAN |
| CD34 | CD34_HUMAN |
| CD36 | CD36_HUMAN |
| CD37 | CD37_HUMAN |
| CD38 | CD38_HUMAN |
| CD4 | CD4_HUMAN |
| CD4 | CD4_HUMAN |
| CD4 | CD4_HUMAN |
| CD4 | CD4_HUMAN |
| CD4 | CD4_HUMAN |
| CD40 | TNR5_HUMAN |
| CD41 | ITA2B_HUMAN |
| CD41a | ITA2B_HUMAN |
| CD42b | GP1BA_HUMAN |
| CD43 | LEUK_HUMAN |
| CD43 | LEUK_HUMAN |
| CD44 | CD44_HUMAN |
| CD44 | CD44_HUMAN |
| CD45 | PTPRC_HUMAN |
| CD45 | PTPRC_HUMAN |
| CD45RA | PTPRC_HUMAN |
| CD45RA | PTPRC_HUMAN |
| CD45RA | PTPRC_HUMAN |
| CD45RB | PTPRC_HUMAN |
| CD45RO | PTPRC_HUMAN |
| CD46 | MCP_HUMAN |
| CD47 | CD47_HUMAN |
| CD48 | CD48_HUMAN |
| CD5 | CD5_HUMAN |
| CD5 | CD5_HUMAN |
| CD50 | ICAM3_HUMAN |
| CD52 | CD52_HUMAN |
| CD53 | CD53_HUMAN |
| CD53 | CD53_HUMAN |
| CD54 | ICAM1_HUMAN |
| CD54 | ICAM1_HUMAN |
| CD55 | DAF_HUMAN |
| CD55 | DAF_HUMAN |
| CD56 | NCAM1_HUMAN |
| CD56 | NCAM1_HUMAN |
| CD57 |  |
| CD58 | LFA3_HUMAN |
| CD58 | LFA3_HUMAN |
| CD59 | CD59_HUMAN |
| CD59 | CD59_HUMAN |
| CD6 | CD6_HUMAN |
| CD6 | CD6_HUMAN |
| CD62L | LYAM1_HUMAN |
| CD62L | LYAM1_HUMAN |
| CD62p | LYAM3_HUMAN |
| CD63 | CD63_HUMAN |
| CD66e | CEAM5_HUMAN |
| CD69 | CD69_HUMAN |
| CD7 | CD7_HUMAN |
| CD7 | CD7_HUMAN |
| CD7 | CD7_HUMAN |
| CD7 | CD7_HUMAN |
| CD71 | TFR1_HUMAN |
| CD71 | TFR1_HUMAN |
| CD72 | CD72_HUMAN |
| CD72 | CD72_HUMAN |
| CD79a | CD79A_HUMAN |
| CD8 | CD8A_HUMAN |
| CD8 | CD8A_HUMAN |
| CD8 | CD8A_HUMAN |
| CD8 | CD8A_HUMAN |
| CD80 | CD80_HUMAN |
| CD86 | CD86_HUMAN |
| CD9 | CD9_HUMAN |
| CD9 | CD9_HUMAN |
| CD95 | TNR6_HUMAN |
| CD97 | CD97_HUMAN |
| CD98 | 4F2_HUMAN |
| CD99 | CD99_HUMAN |
| CD99R | CD99_HUMAN |
| Etoxin-1 | CCL11_HUMAN |
| FDC |  |
| GM-CSF | CSF2_HUMAN |
| hIFNG | IFNG_HUMAN |
| hIFNG | IFNG_HUMAN |
| hIFNG | IFNG_HUMAN |
| hIL-10 | IL10_HUMAN |
| hIL-10 | IL10_HUMAN |
| hIL-10 | IL10_HUMAN |
| hIL-12B | IL12B_HUMAN |
| hIL-12B | IL12B_HUMAN |
| hIL-37 | IL37_HUMAN |
| hIL-37 | IL37_HUMAN |
| hIL-4 | IL4_HUMAN |
| hIL-4 | IL4_HUMAN |
| hIL-4 | IL4_HUMAN |
| hIL-8 | IL8_HUMAN |
| hIL-8 | IL8_HUMAN |
| hIL-8 | IL8_HUMAN |
| HLA I |  |
| HLA-ABC |  |
| HLA-DP | DPB1_HUMAN |
| HLA-DR |  |
| hTNFA | TNFA_HUMAN |
| hTNFA | TNFA_HUMAN |
| hTNFA | TNFA_HUMAN |
| hTSLP | TSLP_HUMAN |
| hTSLP | TSLP_HUMAN |
| IFN gamma | IFNG_HUMAN |
| IgE | FCERA_HUMAN |
| IL-1 beta | IL1B_HUMAN |
| IL-10 | IL10_HUMAN |
| IL-15 | IL15_HUMAN |
| IL-18 | IL18_HUMAN |
| IL-6 | IL6_HUMAN |
| IL-7 | IL7_HUMAN |
| IL-8 | IL8_HUMAN |
| MCP-3 | CCL7_HUMAN |
| MIP-1 alpha | CCL3_HUMAN |
| MPO | PERM_HUMAN |
| pan HLA-class II |  |
| TRAIL | TNF10_HUMAN |
| TRAIL | TNF10_HUMAN |
| TSLPrec | CRLF2_HUMAN |
